## CORRECTION

# Correction: A systematic review of the outcome data supporting the Healthy Living Pharmacy concept and lessons from its implementation

Zachariah Jamal Nazar, Hamde Nazar, Simon White, Paul Rutter

The following information is missing from the Funding statement: This article was funded by the Qatar National Library. The funder had no role in study design, data collection and analysis, decision to publish, or preparation of the manuscript.

## Reference

1. Nazar ZJ, Nazar H, White S, Rutter P (2019) A systematic review of the outcome data supporting the Healthy Living Pharmacy concept and lessons from its implementation. PLoS ONE 14(3): e0213607. <https://doi.org/10.1371/journal.pone.0213607> PMID: 30861046

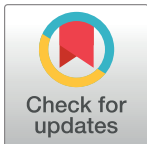

## OPEN ACCESS

**Citation:** Nazar ZJ, Nazar H, White S, Rutter P (2019) Correction: A systematic review of the outcome data supporting the Healthy Living Pharmacy concept and lessons from its implementation. PLoS ONE 14(5): e0216804. <https://doi.org/10.1371/journal.pone.0216804>

**Published:** May 7, 2019

**Copyright:** © 2019 Nazar et al. This is an open access article distributed under the terms of the [Creative Commons Attribution License](https://creativecommons.org/licenses/by/4.0/), which permits unrestricted use, distribution, and reproduction in any medium, provided the original author and source are credited.
